# Supplementary material for: Amelioration in Ankle Pain and Improvement in Function After Total Knee Arthroplasty for Ipsilateral Knee and Ankle Osteoarthritis: A Report of Two Cases
Source: PubMed Central journal article supplement — Arthroplast Today. 2020 Nov 9;6(4):925–30. doi: 10.1016/j.artd.2020.09.005 (PMC7666310; doi:10.1016/j.artd.2020.09.005), 2020-11-09
Supplement: mmc4.pdf [file mmc4.pdf]

# CONFLICT OF INTEREST STATEMENT

## *American Association of Hip and Knee Surgeons*

(Adopted from the American Academy of Orthopaedic Surgeons disclosure statement)

The following form **must be filled out completely and submitted by each author (example, 6 authors, 6 forms).**  
**All items require a response. If there is no relevant disclosure for a given item, enter "None."**

Manuscript Title **Amelioration in ankle pain and improvement in function after total knee arthroplasty for ipsilateral knee and ankle osteoarthritis: A report of two cases**

1. Royalties from a company or supplier (The following conflicts were disclosed)  
**None** *None*
2. Speakers bureau/paid presentations for a company or supplier (The following conflicts were disclosed)  
**None** *None*
- 3A. Paid employee for a company or supplier (The following conflicts were disclosed)  
**None** *None*
- 3B. Paid consultant for a company or supplier (The following conflicts were disclosed)  
**None** *None*
- 3C. Unpaid consultants for a company or supplier (The following conflicts were disclosed)  
**None** *None*
4. Stock or stock options in a company or supplier (The following conflicts were disclosed)  
**None** *None*
5. Research support from a company or supplier as a Principal Investigator (The following conflicts were disclosed)  
**None** *None*
6. Other financial or material support from a company or supplier (The following conflicts were disclosed)  
**None** *None*
7. Royalties, financial or material support from publishers (The following conflicts were disclosed)  
**None** *None*
8. Medical/Orthopaedic publications editorial/governing board (The following conflicts were disclosed)  
**None** *None*
9. Board member/committee appointments for a society (The following conflicts were disclosed)  
**None** *None*

**Each author must sign AND print or type his/her name, date and submit a separate form**

In addition, one BLINDED Conflict of Interest form (no author names used) should be submitted per manuscript with all author disclosures.

*Tatsuya TOMIYA*

Author Name (Print or Type)



Author Signature

*29/Jan/2020*

Date
