# Supplementary material for: Amelioration in Ankle Pain and Improvement in Function After Total Knee Arthroplasty for Ipsilateral Knee and Ankle Osteoarthritis: A Report of Two Cases
Source: PubMed Central journal article supplement — Arthroplast Today. 2020 Nov 9;6(4):925–30. doi: 10.1016/j.artd.2020.09.005 (PMC7666310; doi:10.1016/j.artd.2020.09.005), 2020-11-09
Supplement: mmc5.pdf [file mmc5.pdf]

# CONFLICT OF INTEREST STATEMENT

## *American Association of Hip and Knee Surgeons*

(Adopted from the American Academy of Orthopaedic Surgeons disclosure statement)

The following form **must be filled out completely and submitted by each author (example, 6 authors, 6 forms).**  
**All items require a response. If there is no relevant disclosure for a given item, enter "None."**

---

Manuscript Title **Amelioration in ankle pain and improvement in function after total knee arthroplasty for ipsilateral knee and ankle osteoarthritis: A report of two cases**

1. Royalties from a company or supplier (The following conflicts were disclosed)  
**None**
2. Speakers bureau/paid presentations for a company or supplier (The following conflicts were disclosed)  
**None**
- 3A. Paid employee for a company or supplier (The following conflicts were disclosed)  
**None**
- 3B. Paid consultant for a company or supplier (The following conflicts were disclosed)  
**None**
- 3C. Unpaid consultants for a company or supplier (The following conflicts were disclosed)  
**None**
4. Stock or stock options in a company or supplier (The following conflicts were disclosed)  
**None**
5. Research support from a company or supplier as a Principal Investigator (The following conflicts were disclosed)  
**None**
6. Other financial or material support from a company or supplier (The following conflicts were disclosed)  
**None**
7. Royalties, financial or material support from publishers (The following conflicts were disclosed)  
**None**
8. Medical/Orthopaedic publications editorial/governing board (The following conflicts were disclosed)  
**None**
9. Board member/committee appointments for a society (The following conflicts were disclosed)  
**None**

**Each author must sign AND print or type his/her name, date and submit a separate form**

In addition, one BLINDED Conflict of Interest form (no author names used) should be submitted per manuscript with all author disclosures.

---

|                             |                                                                                      |                |
|-----------------------------|--------------------------------------------------------------------------------------|----------------|
| Makoto Hirao                |  | June. 15. 2020 |
| Author Name (Print or Type) | Author Signature                                                                     | Date           |
